# Supplementary material
Source: PubMed Central journal article supplement (PMC2957288)

## Supplementary Appendix

This appendix has been provided by the authors to give readers additional information about their work.

Supplement to: Hacein-Bey-Abina S, Hauer J, Lim A, et al. Efficacy of gene therapy for X-linked severe combined immunodeficiency. *N Engl J Med* 2010;363:355-64.

## Supplementary material

### Supplementary Patients and Methods

#### Patients

Patient 3, who presented with persistent splenomegaly caused by a disseminated *Bacillus Calmette-Guerin* infection, failed to reconstitute his T-cell compartment due to the progenitor cells' trapping in the spleen. After splenectomy, he successfully received a MUD (matched unrelated donor) HSCT 8 months after gene therapy, according to the protocol.

Patient 9, who was treated in Australia, received  $1 \times 10^6$  cells/kg and had insufficient T cell reconstitution (460 CD3+ per mm<sup>3</sup> at 5 months). He developed neurologic deterioration, gastrointestinal dysfunction and infections which were typical of a poorly reconstituted patient with SCID. He showed thereafter a progressive decline in immune function as well as a progressive reduction in total lymphocyte counts. He was engrafted with a 9/10 antigen matched unrelated donor 26 months after gene therapy and showed a low T-cell reconstitution i.e 400 CD3+ per mm<sup>3</sup> 9 months after transplantation. His clinical course was complicated by chronic GvHD, colitis, persisting neurological dysfunction and recurrent infections. He died from fungal pneumonia 18 months after the allograft <sup>1</sup>.

#### Study design

S.Hacein-Bey-Abina, A. Fischer and M.Cavazzana-Calvo designed the study. A. Lim, C. Picard, G.P.Wang, C.Martinache, F. Rieux-Laucat, S.Latour, B.H.Belohradsky, L.Leiva, R. Sorensen, M.Debré, J.L.Casanova and S.Blanche gathered the data. S.Hacein-Bey-Abina, A. Lim, C. Picard, G.P.Wang, F. Rieux-Laucat, S.Latour, L.Leiva, A.Durandy, F.D.Bushman, and J.Hauer analysed the data. S.Hacein-Bey-Abina, C. Picard, J.Hauer, F Rieux-Laucat, S.Latour, A.Durandy, F.D.Bushman and M.Cavazzana-Calvo vouch for the completeness of the data and analyses. S.Hacein-Bey-Abina, A. Fischer and M.Cavazzana-Calvo wrote the manuscript. S.Hacein-Bey-Abina, A. Fischer and M.Cavazzana-Calvo decided to publish the paper.

#### Methods

Lymphocyte phenotypes and functions and TCR beta, alpha, gamma and delta chain repertoires were analyzed as described elsewhere<sup>2,5</sup>. Patients' B cells were analyzed for affinity maturation and cytokine + CD40L-induced class switch recombination <sup>6</sup>. Signal joint T-cell receptor excision circles (TREC) (sjTRECs;  $\delta\text{Rec-}\psi\text{j}\alpha$ ) were determined using a real-time quantitative polymerase chain reaction (Q-PCR)<sup>7</sup>. The TREC content was expressed in copies per  $1 \times 10^5$  peripheral blood mononuclear cells (PBMCs).

The control value (established in 20 healthy individuals) was between 150 and 2500 copies/ $10^5$  PBMCs.

Naive and memory T-cell subpopulations were sorted by flow cytometry using fluorescence-labeled monoclonal antibodies against CD45RA<sup>+</sup> CD4<sup>+</sup> and CD45RO<sup>+</sup>CD4<sup>+</sup>, respectively. Ligation-mediated PCR was used to sequence vector integration sites in these selected populations <sup>8</sup>. Provirus integration over time was analyzed in a Taqman Q-PCR assay (Applied Biosystems) <sup>3</sup>.

## Supplementary Results

### Clinical outcome

Lung infections cleared within the first 60 days after therapy and did not recur in Patients 1, 2, 7, 8 and 10. Protracted diarrhea resolved in Patients 1, 2 and 10, enabling parenteral nutrition to be discontinued within 3 to 4 months after therapy. Patient 7's pre-existing B-lymphoproliferative disease resolved 3 months after gene therapy. Patient 6's disseminated VZV infection was controlled as soon as the genetically modified T cells appeared in the peripheral circulation.

### T cell characteristics

#### *Long-term immune function*

In order to determine whether distinct T-cell effectors were present in the patients' blood, available samples were screened against surrogate markers for Th1 (IFN $\gamma$ ), Th2 (IL-4) <sup>9-11</sup>. Patients 1 and 8 (tested at 117 and 85 months after therapy, respectively) showed similar proportions of IFN $\gamma$  and IL-4 secreting CD4<sup>+</sup> T cells (after activation by phorbol myristate acetate and ionomycin) as control cells (data not shown).

### B cells and antibody responses

Two years after gene correction, somatic hypermutation frequencies in the IgM V region genes (VH3-23) of CD27<sup>+</sup> B cells were found to be slightly below normal in 3 patients (Patients 1, 2, and 4) since 1.4, 1.3 and 1.9% of the nucleotides were mutated in the analyzed clones, respectively (control range: 2.3 to 6.5%). CD27<sup>+</sup> B cells from Patient 2 were analyzed again 10 years after gene therapy and yielded a frequency of 2.6%. We also analyzed class switch recombination in treated patients to establish the respective role of  $\gamma$ C-dependent and  $\gamma$ C-independent cytokines in immunoglobulin production. Patient 2's B cells showed some proliferation in vitro in response to IL-4 plus CD40 ligand (CD40L), but a strong proliferation to IL-13 plus CD40L (6000 cpm versus 45000 cpm, respectively). In vitro IgE production in response to these 2 cytokines also showed a discrepancy with a lower level (but still considered normal) obtained after IL-4 stimulation than after IL-13 stimulation with respectively: 9676 pg/ml versus 25180 pg/ml. Patient 1's B cells, like those of Patient 2, showed a mild proliferative capacity (8000 cpm) but an absence of IgE secretion in response to IL-4 plus CD40L stimulation, but showed a normal response to IL-13. Patient 5's B cells showed no IgE secretion in response to IL-4 while a strong response to IL-13 was observed ie, 1357 pg/ml versus 50480 pg/ml respectively.

### Supplementary Discussion

Comparison of the long term immune function among groups of immunodeficient patients treated by gene therapy on the one hand and HSCT on the other, is difficult given the small number of patients treated with gene therapy. In HSCT, early CD4+ T-cell counts and naive T-cell counts are predictive of late immune T-cell reconstitution<sup>12</sup>. It was low in only 1 out of 8 patients in our series versus 31.6% in cases treated with HSCT reported by Neven et al. In our series, patient 6 fulfills this prediction since CD4+T-cell counts were initially low; this patient also received the lowest number of transduced cells. Patient 6 also has defective long term thymic output as assessed by low total CD4+, low CD31+/CD45RA+/CD4+ and low TRECs. Eight years after treatment, no clinical impact is evident.

Strikingly, another patient (P1) showed a decline in long term thymic output contrasting with high early T- cell parameters. A hypothesis currently being investigated is the possible partially transdominant negative effect of the endogenous mutated  $\gamma$  chain expressed by patient 1. Persistence of mutated  $\gamma$  chain might alter the physiological  $\gamma$  chain function in homeostatic conditions.

In addition to points discussed in the main text, the persistence of TREC+ naive T cells despite the disappearance of transduced functional stem cells in patients' bone marrows is reminiscent of the setting in some SCID-X1 patients who undergo HSCT without myeloablation. No donor B cells and myeloid cells can be detected in many of these individuals, whereas donor naive T cells are present<sup>12-15</sup>. Overall, our data are compatible with the hypothesis that thymus niches can be occupied by gene-transduced progenitors with self-renewal capacity<sup>16</sup>.

In the long term,  $\gamma$ C(+) B cells were no longer detected. Accordingly, most antibody responses to recall antigens were no longer detectable. Nevertheless, isohemagglutinins (IgM isotype) and responses to *Streptococcus pneumoniae* were at least partially preserved. Memory B cells were detected at a low frequency including switched memory B cells and above normal IgG and IgA levels were detected in 5 out of 8 patients.

Overall this residual B cell function was sufficient to avoid recurrent mucosal infections and made immunoglobulin replacement unnecessary in 5 patients. Patients' B cells were also able to undergo somatic hypermutations (SHM) which take place in the germinal centers (GCs) of lymphoid organs and which are driven by T cell signals. Intimate interaction between B cells and follicular T helper cells (TFH) is required for SHM to occur but  $\gamma$ C-dependent cytokines are dispensable at this step. IL-21 is a key factor for the survival of memory B cells generated in GCs, and for the maintenance of the quality of the antibody response. The IL-21/ $\gamma$ C axis defects are likely responsible for the fact that persistence of normal levels of memory B cells as well as sustained production of antibodies to vaccine antigens are both compromised by the absence of genetically-modified B cells<sup>17-22</sup>.

These data are similar to those observed in SCID-X1 patients who underwent HSCT without myeloablation and indicate that despite an absence of IL21-mediated B cell activation / maintenance, <sup>21, 22</sup>,  $\gamma$ c-independent pathways are preserved, sustaining some B cell response, notably perhaps T-independent antibody responses and extrafollicular B cell activation <sup>21</sup>. In conclusion, these findings indicate that full humoral responses with normal levels of long term memory B cells and stable production of high affinity Ag-specific Abs can only be achieved by stable bone marrow engraftment of genetically modified stem cells, a state that would seem to require myeloablative conditioning regimen, as in the setting of allogeneic HSCT.

**Supplementary References**

1. Ginn SL, Curtin JA, Kramer B, et al. Treatment of an infant with X-linked severe combined immunodeficiency (SCID-X1) by gene therapy in Australia. *Med J Aust* 2005;182(9):458-63.
2. Cavazzana-Calvo M, \*, Hacein-Bey S, \*, de Saint Basile G, et al. Gene therapy of human severe combined immunodeficiency (SCID)-X1 disease. \* equal contribution. *Science* 2000;288(5466):669-72.
3. Hacein-Bey-Abina S, Le Deist F, Carlier F, et al. Sustained correction of X-linked severe combined immunodeficiency by ex vivo gene therapy. *N Engl J Med* 2002;346(16):1185-93.
4. Hacein-Bey-Abina S, Garrigue A, Wang GP, et al. Insertional oncogenesis in 4 patients after retrovirus-mediated gene therapy of SCID-X1. *J Clin Invest* 2008;118(9):3132-42.
5. Lim A, Baron V, Ferradini L, Bonneville M, Kourilsky P, Pannetier C. Combination of MHC-peptide multimer-based T cell sorting with the Immunoscope permits sensitive ex vivo quantitation and follow-up of human CD8+ T cell immune responses. *J Immunol Methods* 2002;261(1-2):177-94.
6. Revy P, Muto T, Levy Y, et al. *Activation-Induced Cytidine Deaminase (AID)* deficiency causes the autosomal recessive form of the Hyper-IgM syndrome (HIGM2). *Cell* 2000;102(5):565-75.
7. Poulin JF, Sylvestre M, Champagne P, et al. Evidence for adequate thymic function but impaired naive Tcell survival following allogeneic hematopoietic stem cell transplantation in the absence of chronic graft-versus-host disease. *Blood* 2003;102(13):4600-7.
8. Wang GP, Garrigue A, Ciuffi A, et al. DNA bar coding and pyrosequencing to analyze adverse events in therapeutic gene transfer. *Nucleic Acids Res* 2008;36(9):e49.
9. Sundrud MS, Grill SM, Ni D, et al. Genetic reprogramming of primary human T cells reveals functional plasticity in Th cell differentiation. *J Immunol* 2003;171(7):3542-9.
10. Bonecchi R, Bianchi G, Bordignon PP, et al. Differential expression of chemokine receptors and chemotactic responsiveness of type 1 T helper cells (Th1s) and Th2s. *J Exp Med* 1998;187(1):129-34.
11. Yamamoto J, Adachi Y, Onoue Y, et al. Differential expression of the chemokine receptors by the Th1- and Th2-type effector populations within circulating CD4+ T cells. *J Leukoc Biol* 2000;68(4):568-74.
12. Neven B, Leroy S, Decaluwe H, et al. Long-term outcome after hematopoietic stem cell transplantation of a single-center cohort of 90 patients with severe combined immunodeficiency. *Blood* 200;113(17):4114-24.
13. Cavazzana-Calvo M, Carlier F, Le Deist F, et al. Long-term T-cell reconstitution after hematopoietic stem cell transplantation in primary T-cell-immunodeficient patients is associated with myeloid chimerism and possibly the primary disease phenotype. *Blood* 2007;109(10):4575-81.

14. Sarzotti-Kelsoe M, Win CM, Parrott RE, et al. Thymic output, T-cell diversity, and T-cell function in long term human SCID chimeras. *Blood* 2009;114(7):1445-53.
15. Mazzolari E, de Martiis D, Forino C, et al. Single-center analysis of long-term outcome after hematopoietic cell transplantation in children with congenital severe T cell immunodeficiency. *Immunol Res* 2009;44(1-3):4-17.
16. Weerkamp F, Baert MR, Brugman MH, et al. Human thymus contains multipotent progenitors with T/B lymphoid, myeloid, and erythroid lineage potential. *Blood* 2006;107(8):3131-7.
17. Pene J, Gauchat JF, Lecart S, et al. Cutting edge: IL-21 is a switch factor for the production of IgG1 and IgG3 by human B cells. *J Immunol* 2004;172(9):5154-7.
18. Avery DT, Bryant VL, Ma CS, de Waal Malefyt R, Tangye SG. IL-21-induced isotype switching to IgG and IgA by human naive B cells is differentially regulated by IL-4. *J Immunol* 2008;181(3):1767-79.
19. Ettinger R, Kuchen S, Lipsky PE. The role of IL-21 in regulating B-cell function in health and disease. *Immunol Rev* 2008;223:60-86.
20. Vogelzang A, McGuire HM, Yu D, Sprent J, Mackay CR, King C. A fundamental role for interleukin-21 in the generation of T follicular helper cells. *Immunity* 2008;29(1):127-37.
21. Tangye SG, Tarlinton DM. Memory B cells: effectors of long-lived immune responses. *Eur J Immunol* 2009;39(8):2065-75.
22. Avery DT, Deenick EK, Ma CS, et al. B cell-intrinsic signaling through IL-21 receptor and STAT3 is required for establishing long-lived antibody responses in humans. *J Exp Med* 2010;207(1):155-71, S1-5.

Suppl. Table. 1: Characteristics of leukemia in 4 patients

|            | Age at therapy (months) | T-ALL (months) | Follow-up (months) | CD34+ $\gamma$ c+ cells infused ( $\times 10^6$ /kg) | Time of first CR (weeks) | Clinical status | Chemotherapy regimen | Leukemia phenotype   | Insertion sites | Chromosomal Abnormalities | Notch Mutation (aa residue) | CDKN2A/P16 /ARF Deletion |
|------------|-------------------------|----------------|--------------------|------------------------------------------------------|--------------------------|-----------------|----------------------|----------------------|-----------------|---------------------------|-----------------------------|--------------------------|
| <b>P4</b>  | 1                       | 30             | 60                 | 18                                                   | -                        | Died            | DCLSG                | Mature T-cell        | LMO2            | t(6,13)                   | -                           | +                        |
| <b>P5</b>  | 3                       | 34             | 112                | 20                                                   | 2                        | A.W., CR        | CCSGT                | Late cortical T-cell | LMO2            | SIL-TAL, trisomy10        | 1593F/S                     | -                        |
| <b>P7</b>  | 11                      | 68             | 105                | 4.3                                                  | 3                        | A.W., CR        | FRALLE 2000BT        | Late cortical T-cell | CCND2           | 0                         | -                           | +                        |
| <b>P10</b> | 8                       | 33             | 88                 | 11.3                                                 | 1                        | A.W., CR        | I-BFM-SG             | Late cortical T-cell | LMO2, BMI-1     | 0                         | 1707A/P                     | -                        |

**A.W:** Alive and Well. **CR** : Complete remission. **B-LPD:** B-lymphoproliferative disease

**DCLSG:** Deutch Childhood Leukemia Study Group; **CCSGT:** Children's Cancer study Group T-ALL protocol ; **FRALLE 2000 BT:** French Acute Lymphoblastic Leukaemia (FRALLE2000BT) protocol; **I-BFM-SG:** International –BFM-Study-Group

Search for mutation or rearrangement for BCR/ABL, NUP214/AB , Hox11/ TLX1, HOX11L2/TLX3 and CALM-AF10 was negative in all 4 cases.

LMO2: LIM domain only 2 gene on chromosome 11, CCND2: cyclin D2 gene, BMI-1: gene in the polycomb group.



Suppl. Table. 2: B cells characteristics and antibodies responses

|                                           | controls                  | P1   |         | P2   |         | P5  |         | P6*** |         | P7*** |         | P8  |         | P10*** |         |
|-------------------------------------------|---------------------------|------|---------|------|---------|-----|---------|-------|---------|-------|---------|-----|---------|--------|---------|
|                                           |                           | <3y  | Last FU | <3y  | Last FU | <3y | Last FU | <3y   | Last FU | <3y   | Last FU | <3y | Last FU | <3y    | Last FU |
| Diphtheriae toxoid*                       | >0.1 IU/ml                | +    | -       | +    | -       | -   | -       | ND    | ND      | ND    | ND      | +   | -       | ND     | ND      |
| Tetanus toxoid*                           | >0.1 IU/ml                | +    | -       | +    | -       | -   | -       | +     | ND      | -     | ND      | +   | -       | +      | ND      |
| Polio viruses*                            | >4 IU/ml                  | +    | -       | +    | -       | -   | -       | +     | ND      | -     | ND      | +   | -       | +      | ND      |
| <i>S. pneumoniae</i> **                   | >4 fold increase in titer | ND   | +       | +    | +       | +   | -       | ND    | ND      | ND    | ND      | -   | -       | +      | ND      |
| <i>Haemophilus</i> ** influenzae (type b) | >1µg/ml                   | +    | ND      | +    | +       | +   | -       | ND    | ND      | ND    | ND      | -   | -       | ND     | ND      |
| Isohemagglutinins                         | > 1:8                     | 1:64 | 1:16    | 1:32 | 1:64    | 1:4 | ND      | 1:256 | 1:256   | 1:1   | ND      | 1:4 | -       | 1:4    | ND      |
| CD19+ γc+ cells (%)                       | 100                       | 0.9  | <0.01   | 1.1  | <0.01   | 2   | <0.01   | ND    | <0.01   | ND    | <0.01   | 1   | <0.01   | 1      | ND      |
| IL 21-dependent IgA response              | > 5000 ng/ml              | ND   | -       | ND   | -       | ND  | -       | ND    | -       | ND    | -       | ND  | -       | ND     | ND      |
| Memory B cells # (%CD27+CD19+)            | >10%                      | 3    | 2       | 9    | 30      | 7   | 3       | 5     | 9       | 4     | ND      | 3   | 12      | ND     | 8       |

\*Antibodies against poliovirus antigens, tetanus toxoid and diphtheria toxoid, were first found at protective values as evaluated three months after the third immunization in all patients except patient 5. However in all of them, this initially protective response declined to negative values when tested 1 year after vaccination.

\*\*All patients have been immunized with *Streptococcus pneumoniae* and *Haemophilus influenzae* one year after gene therapy. Antibodies are tested against a mix of 23 *Streptococcus pneumoniae* serotypes.

\*\*\*Patients 6, 7 and 10 have not been evaluated for antibodies persistence given that IVIg has been restarted for them.

# The values for CD27+/CD19+ memory B cells were determined at 2 years and at last follow-up.

Last FU: Last follow-up; y: years; ND: not done

## Supplementary Figure Legends

### Suppl. Figure 1: TCR V $\beta$ repertoire analysis after gene therapy

The immunoscope profile's horizontal axis indicates the CDR3 length (in amino acids) and the vertical axis displays the arbitrary fluorescence intensity of the runoff products. The numbers on each profile correspond to the frequency of the corresponding family representation for TCR V $\beta$  or V $\alpha$  (IMGT nomenclature).

TCRV $\beta$  immunoscope profiles for 5 representative V $\beta$  families in Patients 1 until 108 months, P2 until 121 months, P6 until 84 months, P8 until 93 months, (A) and Patients 5 until 112 months, P7 until 101 months, and P10 until 81 months, (B). Each panel shows CDR3 length distribution profiles for V $\beta$ 2, V $\beta$ 7, V $\beta$ 11, V $\beta$ 20 and V $\beta$ 25 families at different time points (M = months post-gene therapy). P7 displayed at 101 months a similar CDR3 rearrangement in V $\beta$ 7 family than the one observed at the time of leukemia. This peak has therefore been analyzed and fortunately showed a different sequence than the pathological clone.

### Suppl. Figure 2: TCR V $\alpha$ repertoire analysis after gene therapy

Immunoscope profiles for CDR3 size for all the 33 TCR V $\alpha$  gene families in healthy control, Patient 2 at 121 months and Patient 8 at 93 months post-therapy (A) Patient 5 at 112 months and Patient 7 at 101 months (B). All the CDR3 length distributions were Gaussian unless for P7 who still showed less diverse repertoire shortly after chemotherapy discontinuation.

### Suppl. Figure 3:

Taqman quantification of the V $\delta$  (upper panel) and V $\gamma$  (lower panel) families in T cells from a control subject (black) and from Patients 1 (yellow), P2 (orange), P5 (blue), P6 (pink), P7 (deep blue) P8 (green) and P10 (grey) in the most recent sample collected to date.

### Suppl. Figure 4: T cell proliferative responses and NK cell subset

(A) Change over time in T cell proliferative responses in P1, P2, P6, P8 (left panel) and P7, P10 (right panel) following stimulation with phytohemagglutinin (PHA). Dashed line indicates normal values which represent the 5<sup>th</sup> centile of values observed in normal controls.

(B) Change over time in absolute CD56+CD3- NK cell absolute counts (per cubic millimeter of whole blood and as measured by flow cytometry). Shaded area indicates reference values for age-matched controls.

### Suppl. Figure 5: Retroviral integration sites analysis in memory and naive T cells from Patients 2 and 8.

Tests were carried out on samples taken 102 months (Patient 2) or 73 months (Patient 8) post-gene therapy. The bar graphs specify the integration sites by the nearest gene. The presence of an asterisk means that the integration site lies outside the indicated gene, whereas integration sites lacking an asterisk are within the indicated gene. Grey indicates all other low abundance sites. (A) Patient 2, naive T-cells (left) and memory T-cells (right). (B) Patient 8, naive T-cells (left) and memory T-cells (right).

Suppl.Fig.1

A

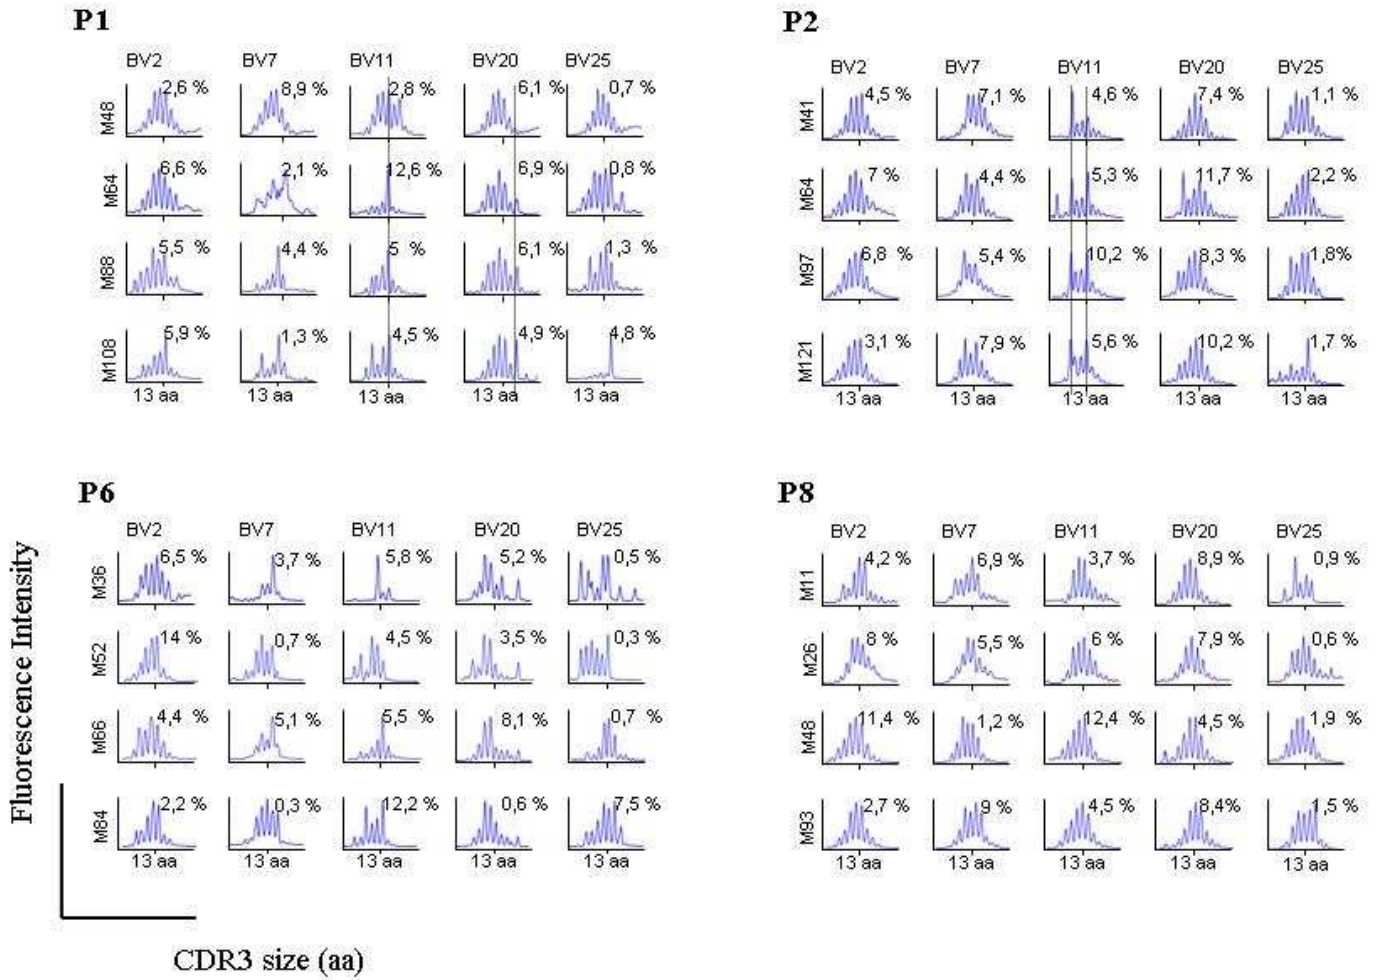

**B**

**P5**

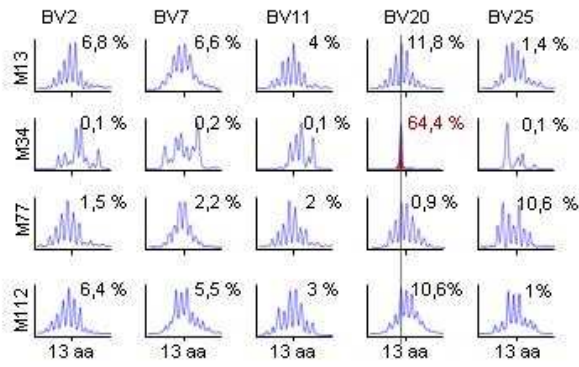

**P7**

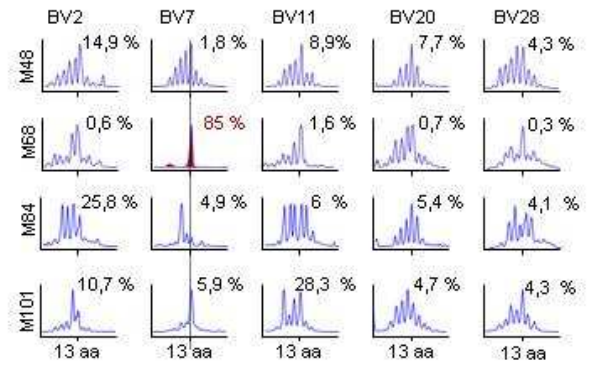

**P10**

Fluorescence Intensity

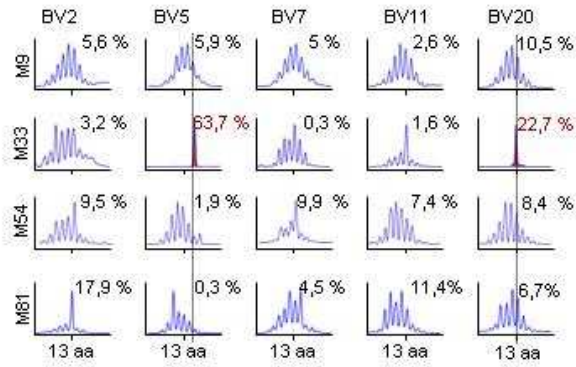

CDR3 size (aa)

**Suppl.Fig.2**

**A**

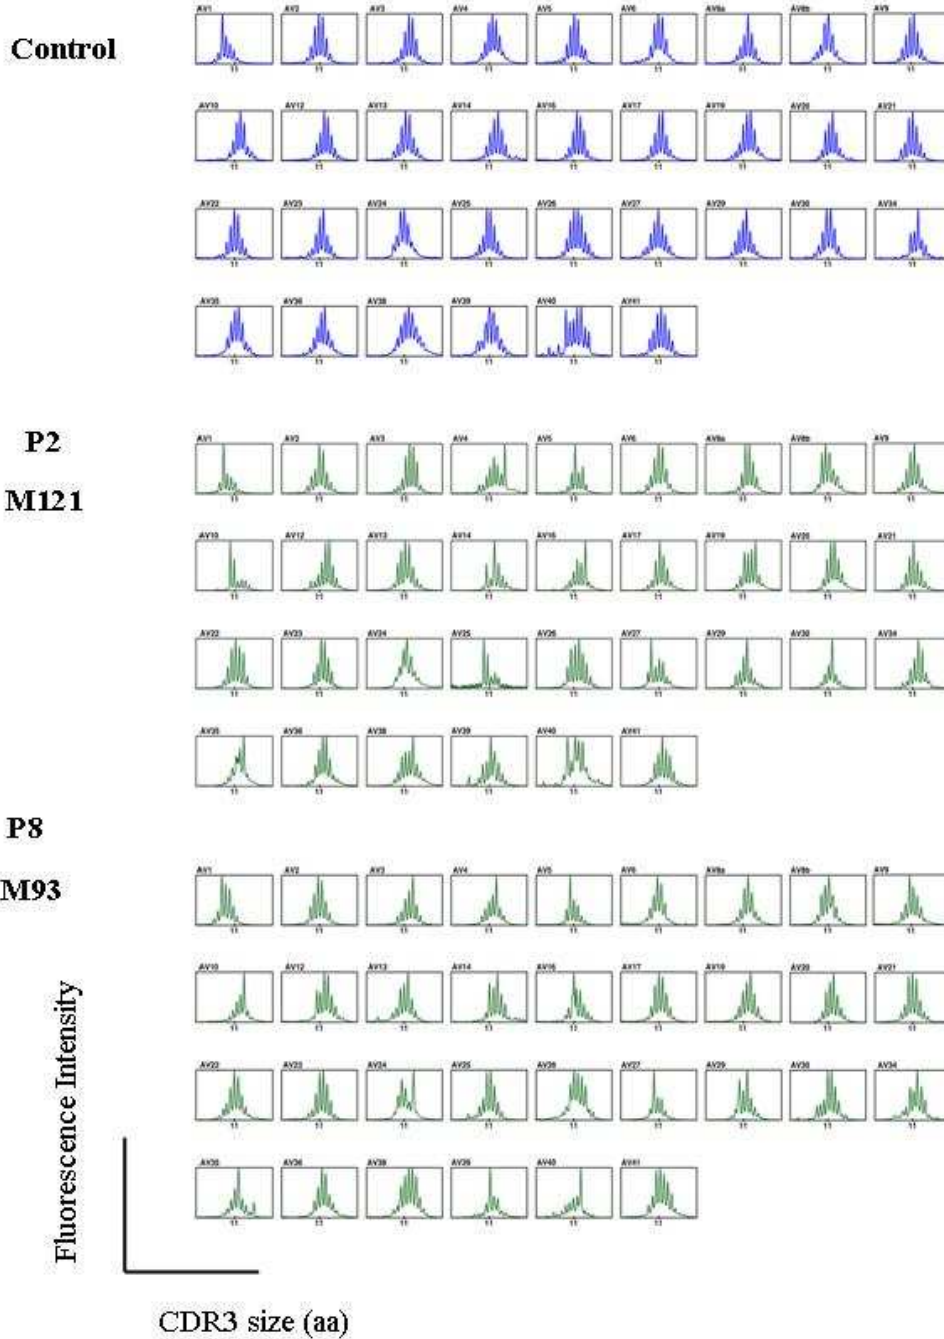

**B**

**P5  
M112**

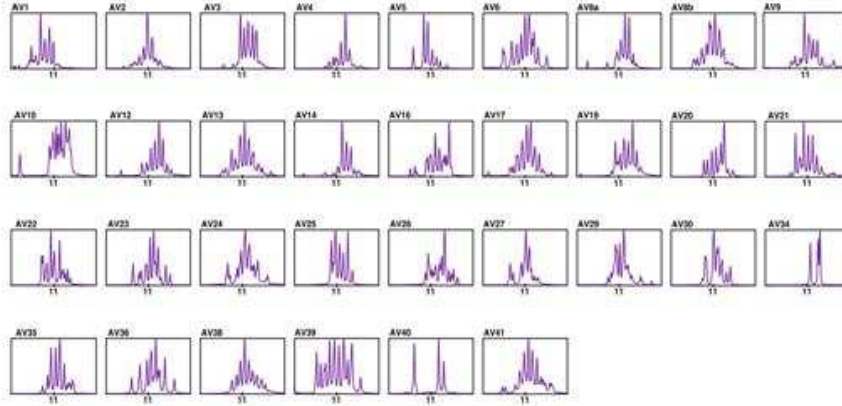

**P7  
M101**

Fluorescence Intensity

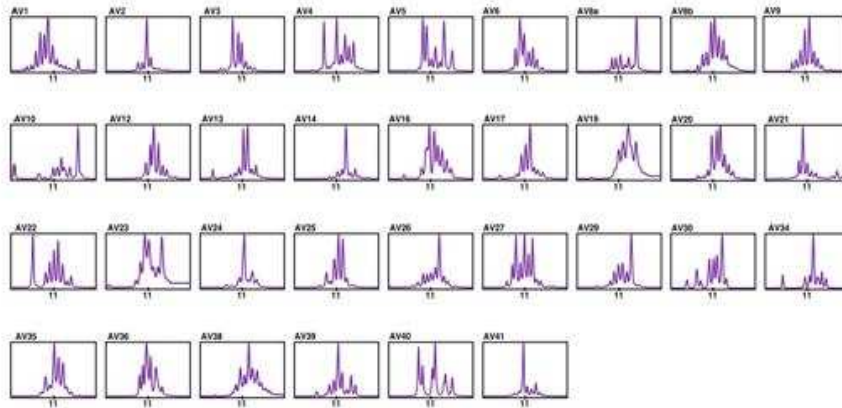

CDR3 size (aa)

**Suppl. Fig. 3**

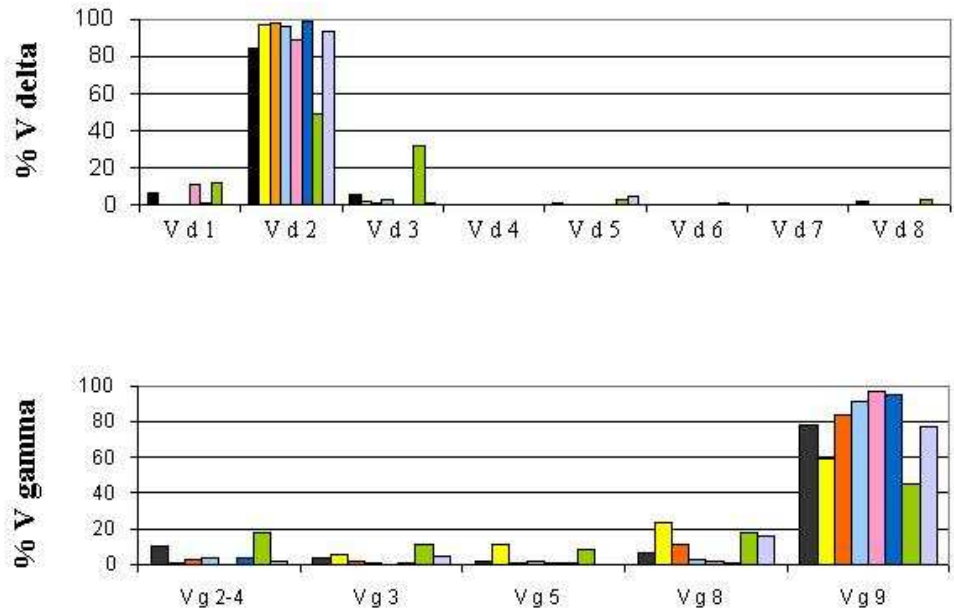

Suppl. Fig.4

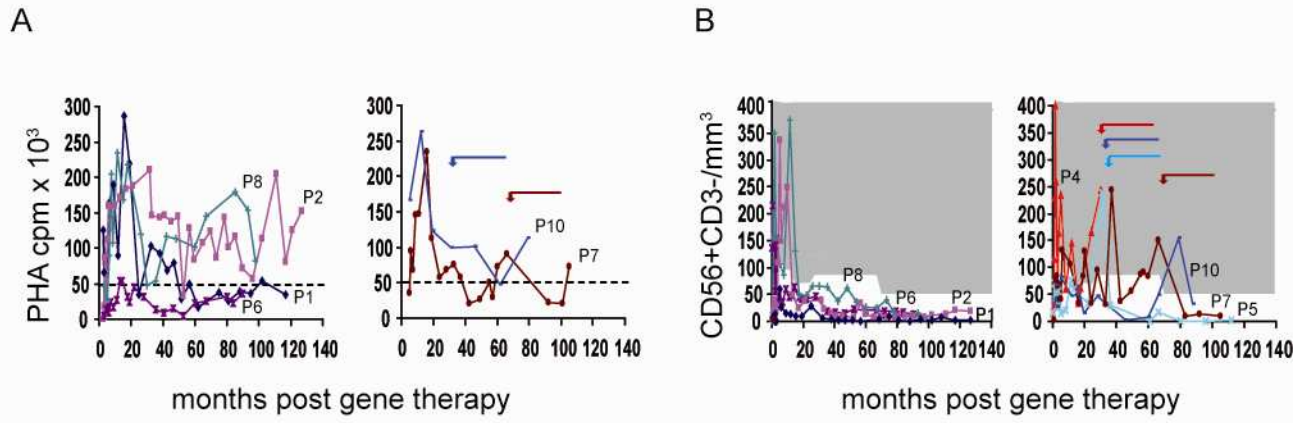



Suppl. Fig. 5

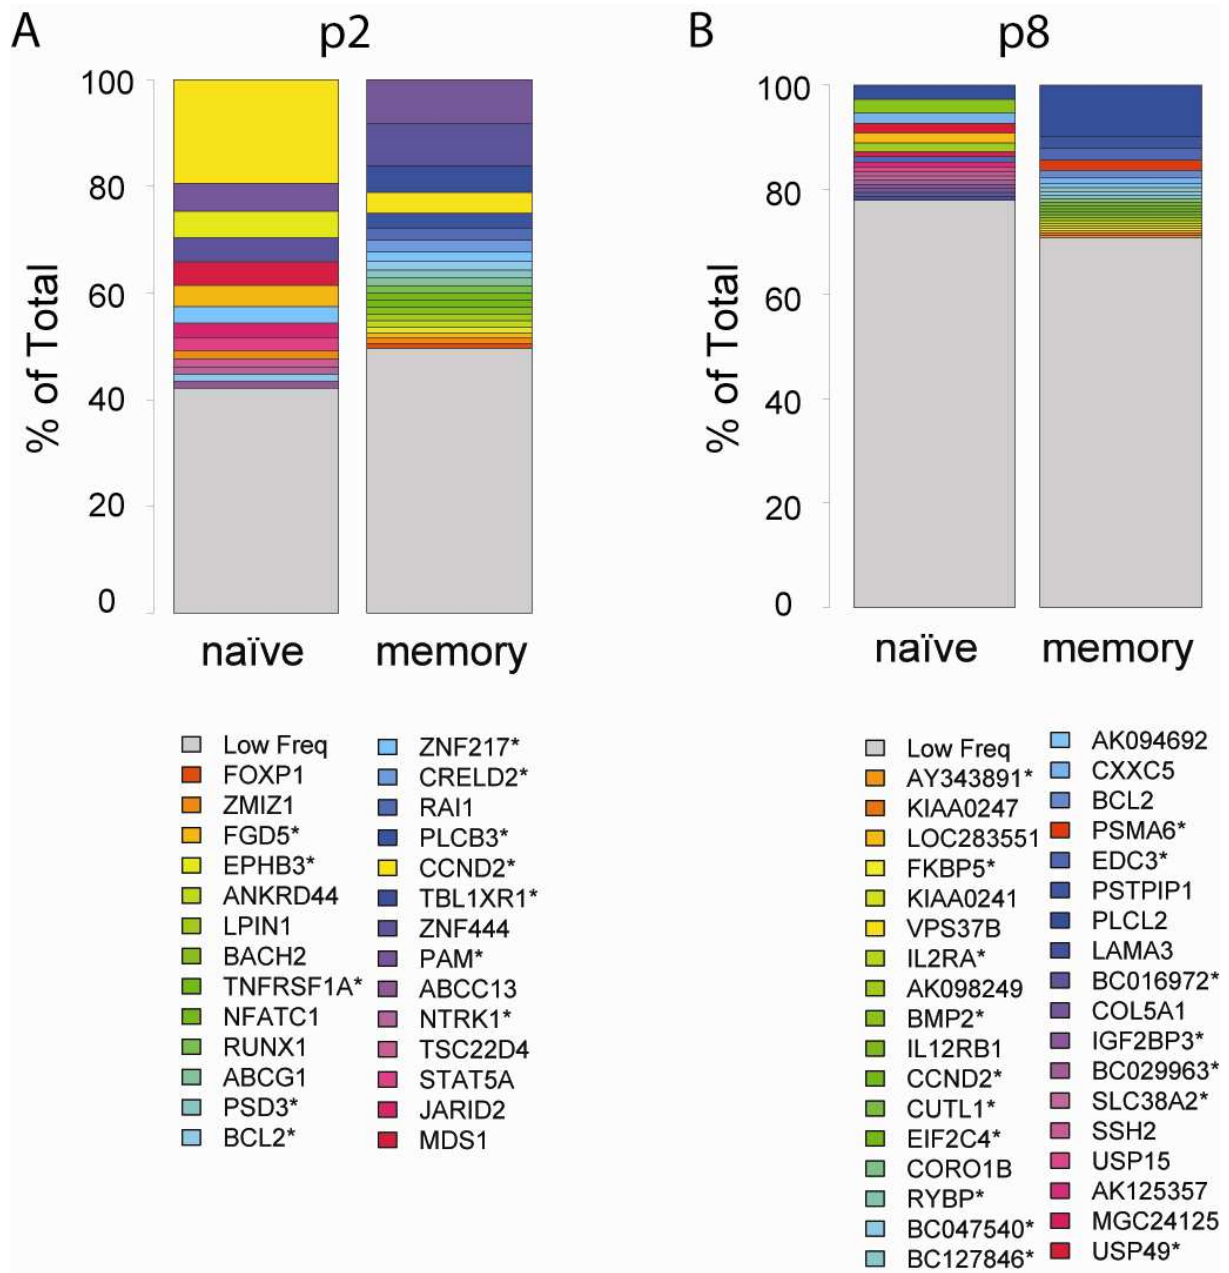

Supplement: NIHMS228632-supplement-Supplement1.pdf [file NIHMS228632-supplement-Supplement1.pdf]
